# Supplementary material for: Association of decreased grip strength with lower urinary tract symptoms in women: a cross‐sectional study from Korea
Source: Springer Nature journal article supplement (doi:10.1186/s12905-021-01241-4), 2021-03-04
Supplement: MOESM1 [file 18929354]

# Health Check-up Questionnaire

|             |  |               |  |         |   |
|-------------|--|---------------|--|---------|---|
| Name        |  | Birthday      |  | Sex/Age | / |
| Hospital ID |  | Check-up date |  |         |   |

## DISEASE

1. Please indicate below if you have any current medical condition.

|                                                     |  |                 |  |                |  |
|-----------------------------------------------------|--|-----------------|--|----------------|--|
| Hypertension                                        |  | Diabetes        |  | Hyperlipidemia |  |
| Tuberculosis                                        |  | Stroke          |  | Heart Disease  |  |
| Liver Disease                                       |  | Thyroid Disease |  | Osteoporosis   |  |
| Cancer                                              |  | disease entity  |  |                |  |
| Etc.<br>( if you have any other diagnosed disease ) |  |                 |  |                |  |

2. Please indicate below if any of your family members have current medical condition.

|                                                     |  |                 |  |                |  |
|-----------------------------------------------------|--|-----------------|--|----------------|--|
| Hypertension                                        |  | Diabetes        |  | Hyperlipidemia |  |
| Tuberculosis                                        |  | Stroke          |  | Heart Disease  |  |
| Liver Disease                                       |  | Thyroid Disease |  | Osteoporosis   |  |
| Cancer                                              |  | disease entity  |  |                |  |
| Etc.<br>( if you have any other diagnosed disease ) |  |                 |  |                |  |

## LIFE STYLE

### 1. Do you smoke?

Never

No, only in the past

Yes

The amount of smoking per day  
pack/day

The period of smoking  
year(s) month(s)

### 2. Do you drink?

No

Yes

How often do you drink per week?  
day/week

How much do you usually drink at once?

1-2 glasses  3-4 glasses

1 bottle  2 bottles  more than 3 bottles

### 3. Do you exercise?

No

Yes (예)

How often do you exercise per week?  
day/week

# STRESS

## BEPSI questionnaire

|                                                                                                                                                                 |                                                                                                                                                                                   |
|-----------------------------------------------------------------------------------------------------------------------------------------------------------------|-----------------------------------------------------------------------------------------------------------------------------------------------------------------------------------|
| 1. In the past month have you ever felt as if there are more demands in your life, emotionally and physically, than you can handle comfortably?                 | <input type="checkbox"/> always<br><input type="checkbox"/> frequently<br><input type="checkbox"/> sometimes<br><input type="checkbox"/> rarely<br><input type="checkbox"/> never |
| In the past month, have you ever felt frustrated trying to live up to your own expectations or standards?                                                       | <input type="checkbox"/> always<br><input type="checkbox"/> frequently<br><input type="checkbox"/> sometimes<br><input type="checkbox"/> rarely<br><input type="checkbox"/> never |
| 3. In the past month, have you ever felt that your needs as a person are being left unmet?                                                                      | <input type="checkbox"/> always<br><input type="checkbox"/> frequently<br><input type="checkbox"/> sometimes<br><input type="checkbox"/> rarely<br><input type="checkbox"/> never |
| 4. In the past month have you ever felt uncertain or apprehensive about the future?                                                                             | <input type="checkbox"/> always<br><input type="checkbox"/> frequently<br><input type="checkbox"/> sometimes<br><input type="checkbox"/> rarely<br><input type="checkbox"/> never |
| 5. In the past month, have you ever felt that there are so many everyday hassles and crises that you lose track of the things that are really important to you? | <input type="checkbox"/> always<br><input type="checkbox"/> frequently<br><input type="checkbox"/> sometimes<br><input type="checkbox"/> rarely<br><input type="checkbox"/> never |

## OABSS

Please select the option that applies best to your urinary conditions during the last week.

|                                                                                                           |                                                                                                                                                                                                                                                                                       |
|-----------------------------------------------------------------------------------------------------------|---------------------------------------------------------------------------------------------------------------------------------------------------------------------------------------------------------------------------------------------------------------------------------------|
| 1. How many times do you typically urinate from waking in the morning until sleeping at night?            | <input type="checkbox"/> 7 or less<br><input type="checkbox"/> 8 to 14<br><input type="checkbox"/> 15 or more                                                                                                                                                                         |
| 2. How many times do you typically wake up to urinate from sleeping at night until waking in the morning? | <input type="checkbox"/> 0<br><input type="checkbox"/> 1<br><input type="checkbox"/> 2<br><input type="checkbox"/> 3 or more                                                                                                                                                          |
| 3. How often do you have a sudden desire to urinate, which is difficult to defer?                         | <input type="checkbox"/> not at All<br><input type="checkbox"/> less than once a week<br><input type="checkbox"/> once a week or more<br><input type="checkbox"/> about once a day<br><input type="checkbox"/> 2 to 4 times per day<br><input type="checkbox"/> 5 times a day or more |
| 4. How often do you leak urine, because you cannot defer the sudden desire to urinate?                    | <input type="checkbox"/> not at All<br><input type="checkbox"/> less than once a week<br><input type="checkbox"/> once a week or more<br><input type="checkbox"/> about once a day<br><input type="checkbox"/> 2 to 4 times per day<br><input type="checkbox"/> 5 times a day or more |
